# Supplementary material for: Association of common variants identified by recent genome-wide association studies with obesity in Chinese children: a case-control study
Source: BMC Med Genet. 2016 Jan 22;17:7. doi: 10.1186/s12881-016-0268-4 (PMC4724138; doi:10.1186/s12881-016-0268-4)
Supplement: Additional file 1: Table S1. — Basic genotyping information of 40 GWA studies-derived SNPs in Chinese children. (XLSX 16 kb) [file 12881_2016_268_MOESM1_ESM.xlsx]

## Sheet: Sheet1
Table S1 Basic genotyping information of 40 GWA studies-derived SNPs in Chinese children
SNP	Nearest gene	Chr	Position	Allele		Call rate	Genotype in total sample	Genotype（11/12/22）
				Effect	Other			Normal-weight group	Overweight group	Obese group
				-1	-2		(11/12/22)
Speliotes et al. 2010 (in children and adults of European ancestry) [4]
rs1558902	FTO	16	52361075	A	T	0.9961	39/457/1526	7/129/470	17/162/538	15/166/518
rs2867125	TMEM18	2	612827	C	T	0.9857	1658/323/20	493/97/8	589/109/8	576/117/4
rs571312	MC4R	18	55990749	A	C	0.9783	105/708/1173	28/194/373	36/265/398	41/249/402
rs10938397	GNPDA2	4	44877284	G	A	1	191/862/977	44/250/313	78/310/330	69/302/334
rs10767664	BDNF	11	27682562	A	T	0.9877	608/977/420	182/286/133	212/351/146	214/340/141
rs2815752	NEGR1	1	72585028	A	G	0.9926	1718/281/16	508/91/4	616/92/4	594/98/8
rs7359397	SH2B1	16	28793160	T	C	0.9921	59/539/1416	19/150/437	22/197/492	18/192/487
rs9816226	ETV5	3	187317193	T	A	0.9921	1891/121/2	560/43/0	678/33/2	653/45/0
rs3817334	MTCH2	11	47607569	T	C	0.9921	233/871/909	72/250/281	77/316/319	84/305/309
rs29942*	KCTD15	19	39001117	C	T	0.9847	129/731/1139	39/222/337	52/253/401	38/256/401
rs543874	SEC16B	1	176156103	G	A	0.9906	103/689/1219	21/188/393	34/248/428	48/253/398
rs987237	TFAP2B	6	50911009	G	A	0.9975	62/600/1363	14/170/422	20/204/492	28/226/449
rs7138803	FAIM2	12	48533735	A	G	0.9941	139/860/1019	31/261/312	61/298/353	47/301/354
rs10145154*	NRXN3	14	79009278	T	C	0.9931	0/14/2001	0/3/598	0/3/710	0/8/693
rs713586	RBJ	2	25011512	C	T	0.9567	446/992/504	121/293/169	150/360/174	175/339/161
rs6497416*	GPRC5B	16	19783646	Monomorphic
rs2241423	MAP2K5	15	65873892	G	A	0.9911	331/981/700	78/284/240	123/363/225	130/334/235
rs2287019	QPCTL	19	50894012	C	T	0.9911	1375/566/71	422/157/23	488/204/20	465/205/28
rs1514175	TNNI3K	1	74764232	A	G	0.9911	1216/716/80	362/209/31	434/256/23	420/251/26
rs13107325	SLC39A8	4	103407732	T	C	0.9941	0/3/2014	0/0/603	0/2/712	0/1/699
rs2112347	FLJ35779	5	75050998	T	G	0.9901	370/1015/625	120/295/186	123/361/226	127/359/213
rs16912921*	LRRN6C	9	28403461	A	C	0.9803	177/848/965	46/261/284	66/300/337	65/287/344
rs3810291	TMEM160	19	52260843	A	G	0.9906	169/824/1018	45/249/308	70/302/340	54/273/370
rs887912	FANCL	2	59156381	T	C	0.9941	0/20/1997	0/7/596	0/4/707	0/9/694
rs13078807	CADM2	3	85966840	G	A	0.9921	0/20/1993	0/5/596	0/7/705	0/8/692
rs11847697	PRKD1	14	29584863	T	C	0.9951	0/4/2015	0/1/603	0/3/711	0/0/701
rs2890652	LRP1B	2	142676401	C	T	0.9956	0/2/2018	0/0/606	0/1/710	0/1/702
rs1555543	PTBP2	1	96717385	C	A	0.9916	1504/478/31	462/130/10	529/173/9	513/175/12
rs9579083*	MTIF3	13	26915270	C	G	0.9887	57/472/1478	11/137/451	23/167/520	23/168/507
rs4836133	ZNF608	5	124360002	Triallelic
rs4929949	RPL27A	11	8561169	C	T	0.9926	319/976/720	103/289/212	121/340/251	95/347/257
rs206936	NUDT3	6	34410847	G	A	0.9901	509/1015/486	151/314/138	185/343/182	173/358/166
Scherag et al. 2010 (in children and adults of European ancestry) [6]
rs12145833	SDCCAG8	1	241550377	T	G	0.9941	1682/323/13	511/87/5	587/123/5	584/113/3
rs13278851	TNKS/MSRA	8	9788282	A	G	0.9931	43/484/1489	17/147/439	9/186/518	17/151/532
Bradfield et al. 2012 (in children of European ancestry) [5]
rs9568856	OLFM4	13	52962982	A	G	0.9576	194/886/864	51/259/273	69/326/292	74/301/299
rs9299	HOXB5	17	44024429	A	G	0.9665	548/993/421	151/302/133	195/344/153	202/347/135
Okada et al. 2012 (in East Asians) [8]
rs2206734	CDKAL1	6	20802863	G	A	0.9601	675/943/331	189/291/104	221/336/131	265/316/96
rs11142387	KLF9	9	72188152	C	A	0.9645	201/869/888	68/264/254	69/296/325	64/309/309
Wen et al. 2012 (in East Asians) [7]
rs261966*	PCSK1	5	95875343	G	A	0.9645	400/946/612	107/296/184	154/324/210	139/326/218
rs12597579	GP2	16	20165368	C	T	0.9571	1026/782/135	302/233/45	358/281/46	366/268/44
Chr, Chromosome; Position: NCBI build 36.3 (NCBI, Bethesda, MD); EAF, Effect allele frequency; HWE, Hardy-Weinberg equilibrium. Shaded rows include either (i) 6 SNPs with minor allele frequency below 1%, (ii) one monomorphic SNP and (iii) one triallelic SNP, these SNPs were excluded from subsequent analyses. *Proxy SNPs were used in the present study to replace the SNPs from the discovery studies.
